# Supplementary material for: Public health economics: a systematic review of guidance for the economic evaluation of public health interventions and discussion of key methodological issues
Source: Springer Nature journal article supplement (doi:10.1186/1471-2458-13-1001), 2013-10-24
Supplement: 12889_2013_5962_MOESM2_ESM.pdf [file 12889_2013_5962_MOESM2_ESM.pdf]

Potentially relevant references = 36

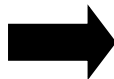

References excluded at  
abstract screening stage =  
13

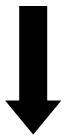

Relevant references = 23

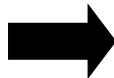

Articles in languages other  
than English and therefore  
excluded = 0

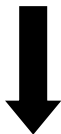

Articles meeting inclusion criteria  
and therefore included in the  
review = 16

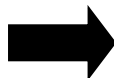

Articles that did not meet  
the inclusion criteria and  
therefore excluded = 7
